# Supplementary material for: Isolation and Identification Antagonistic Bacterium Paenibacillus tianmuensis YM002 against Acidovorax citrulli
Source: Frontiers journal article supplement (doi:10.3389/fpls.2023.1173695), 2023-06-12
Supplement: Data_Sheet_2.PDF [file Data_Sheet_2.PDF]

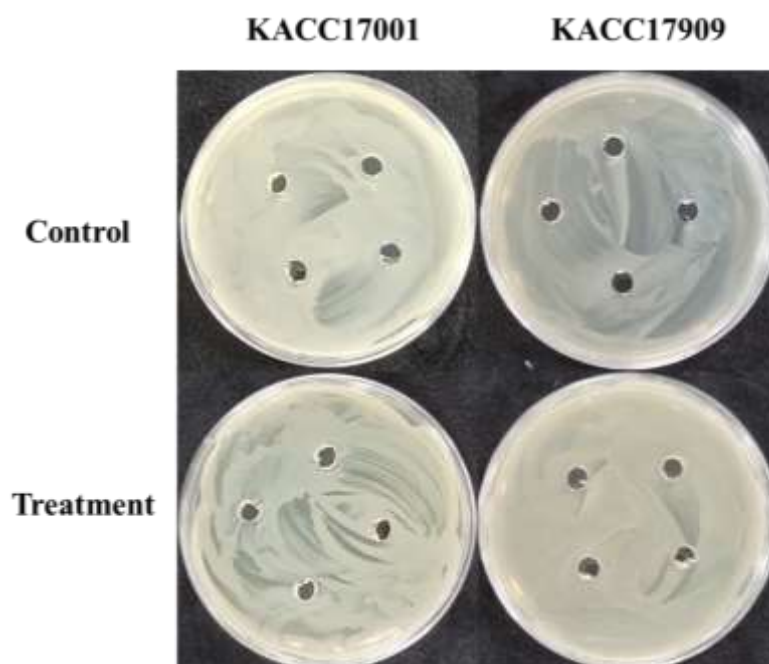

**Supplementary Figure 1.** No bactericidal/bacteriostatic activity of culture filtrate (CF) of YM002 against *Acidovorax citrulli* strains KACC17001 and KACC17909. Bactericidal/bacteriostatic activity of CF of YM002 was tested by agar well diffusion assay. The wells were prepared by punching King's B (KB) agar plates seeded with *A. citrulli* by using a sterile cork borer (5.5 mm in diameter). Each wells were filled up with either 50  $\mu$ L of KB media (Control) or 50  $\mu$ L of CF of YM002 (Treatment), then incubated at 28°C for 72h. CF of YM002 was prepared as described in materials and methods section (See 2.5 Biofilm formation assay). CF of YM002 did not show growth inhibition activity against *A. citrulli* strains KACC17001 and KACC17909. Experiments were repeated 3 times with similar results.
